# Supplementary material for: A shotgun metalloproteomic approach enables identification of proteins involved in the speciation of a ruthenium anticancer drug in the cytosol of cancer cells
Source: Royal Society of Chemistry journal article supplement (doi:10.1039/c5an00426h), 2015-01-01
Supplement: c5an00426h1.pdf [file c5an00426h1.pdf]

# A shotgun metalloproteomic approach enables identification of proteins involved in the speciation of a ruthenium anticancer drug in cytosol of cancer cells†

Magdalena Matczuk,<sup>\*a</sup> Monika Kupiec,<sup>a</sup> Joanna Legat,<sup>a</sup> Katarzyna Pawlak,<sup>a</sup> Andrei R. Timerbaev,<sup>b</sup> and Maciej Jarosz,<sup>a</sup>

<sup>a</sup>*Chair of Analytical Chemistry, Faculty of Chemistry, Warsaw University of Technology, Noakowskiego St. 3, 00-664 Warsaw, Poland*

*mmatczuk@ch.pw.edu.pl, Fax: +48222347408, Tel.: +48222347109*

<sup>b</sup>*Vernadsky Institute of Geochemistry and Analytical Chemistry, Kosygin St. 19, 119991 Moscow, Russian Federation*

## Electronic supplementary information

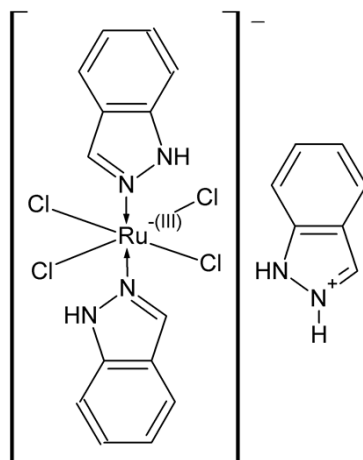

**Fig. S1** Structural formula of the Ru drug.

**Table S1** Operational parameters of SEC-ICP-MS and  $\mu$ HPLC-ESI-QqQ-MS

|                                          |                                                                                     |
|------------------------------------------|-------------------------------------------------------------------------------------|
| <b>SEC-ICP-MS</b>                        |                                                                                     |
| Column                                   | Superdex 200 10/300 GL                                                              |
| Column temperature                       | 20 °C                                                                               |
| Injection volume                         | 100 $\mu$ L                                                                         |
| Mobile phase                             | 10 mM ammonium acetate, pH 6.0                                                      |
| Flow rate                                | 0.5 mL min <sup>-1</sup>                                                            |
| RF power                                 | 1360 W                                                                              |
| Plasma, auxiliary and nebulizer gas flow | 15.0, 1.0 and 1.05 L min <sup>-1</sup> , respectively                               |
| Cones                                    | sampler – Pt, skimmer – Pt                                                          |
| Monitored isotopes                       | <sup>102</sup> Ru, <sup>57</sup> Fe                                                 |
| Dwell time                               | 100 ms                                                                              |
| <b><math>\mu</math>HPLC-ESI-QqQ-MS</b>   |                                                                                     |
| Column                                   | Zorbax SB-C18                                                                       |
| Column and autosampler temperature       | 37 °C                                                                               |
| Injection volume                         | 0.5 $\mu$ L                                                                         |
| Mobile phase                             | 0.1% (v/v) formic acid in water (A),<br>methanol (B)                                |
| Flow rate                                | 6 $\mu$ L min <sup>-1</sup>                                                         |
| Elution program                          | 0–5 min – 0% B<br>5–20 min – 0–100% B<br>20–30 min – 100% B<br>30–32 min – 100–0% B |
| Polarity                                 | positive (+)                                                                        |
| Mode                                     | SCAN, Product Ion                                                                   |
| Mass range                               | <i>m/z</i> 50 – 1500                                                                |
| Ionization voltage                       | 2000 V (+)                                                                          |
| Orifice voltage                          | 90 V                                                                                |
| Drying gas flow                          | 5 L min <sup>-1</sup>                                                               |
| Drying gas temperature                   | 300 °C                                                                              |
| Nebulizer pressure                       | 35 psi                                                                              |
| Sheath gas flow                          | 10 L min <sup>-1</sup>                                                              |
| Sheath gas temperature                   | 350 °C                                                                              |
| Nozzle voltage                           | 500 V                                                                               |
| Collision energy                         | 5–40 eV                                                                             |

### Determination of total protein concentration in cytosol of cancer cells

In order to assess the proteomic procedure parameters, such as the proper amounts of *DL*-dithiothreitol (DTT), iodoacetamide (IAM), or trypsin (from bovine pancreas) to be added to the total concentration of proteins in cytosol of cancer cells was determined using Bradford test. As a standard the cytosol from human liver was taken (pooled fraction, Sigma-Aldrich), in which the protein concentration is known (20 g L<sup>-1</sup>). Three solutions were prepared: 0.1 M NaCl as blank, cytosol standard, and cancer cell cytosol, both diluted 20-times in 0.1 M NaCl. To 0.1 mL of the resultant samples, the Bradford reagent (3 mL) was added. After 10 min the

absorbance of cytosol samples (in comparison to blank solution) was measured at a wavelength of 595 nm.

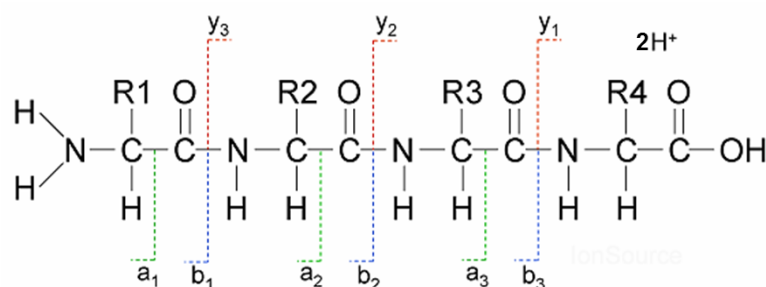

**Fig. S2** Biermann's nomenclature of peptide fragmentation ions.

### Identification of proteins presented in cytosol of cancer cells

In order to identify the main proteinaceous binding partners for Ru complex under cytosolic conditions, the proteins presented in the sample should be first detected. The HMM fraction of cancer cytosol was subjected to a proteolytic treatment including the reduction, alkylation, and digestion steps, before sample ultrafiltration (in order to separate only digested peptides) and analyzed by  $\mu$ HPLC-ESI-MS. As was mentioned in Experimental part, analyses of blanks were also carried out (prepared as the sample but containing only 5 mM ammonium acetate, pH 6.0 or a mixture of DTT, IAM, and trypsin in ammonium acetate solution). A chromatogram of resulting proteinaceous cytosolic fraction is shown in Fig. S3.

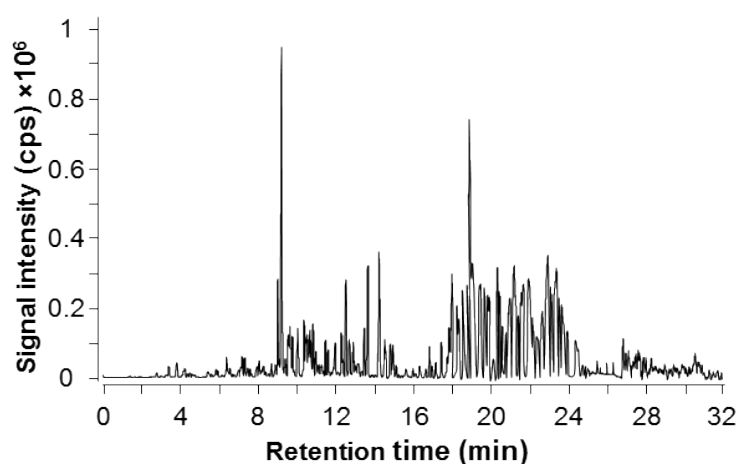

**Fig. S3** The fingerprinting total-ion-current chromatogram of digested HMM fraction of cytosol of cancer cells after subtracting the signals from DTT, IAM, trypsin, and ammonium acetate buffer (registered in positive ionization mode). For analysis parameters, see Experimental.

Based on the obtained chromatographic signals the parent ions were chosen to collision induced dissociation experiments. When at least three specific digested peptides of a given protein were identified on the basis of their fragmentation ions, the protein was regarded as presenting in the cytosol. The applied methodology allowed for identification of 15 cytosolic proteins: pro-apoptotic – Apaf1, cytochrome c (CytC), p53; inhibitors of apoptosis – APC and BCL2; regulators of cell progression – p16, p21, RB; heat shock proteins – HSP27 and HSP70; DNA repair proteins: BLM, BRCA1, BRCA2, XP-C, SMS. The detailed information about the observed fragmentation ions and identified specific peptides for the detected proteins is summarized in Table S2. The exemplary scanning and fragmentation spectra for the cytochrome c peptide (EER) (at the retention time of 12 min;  $m/z$  455) are presented in Fig. S4.

**Table S2** Proteins identified in cytosol of cancer cells by  $\mu$ HPLC-ESI-QqQ-MS method

| Identified protein (molecular mass in kDa) | Identified characteristic peptide | Monoisotopic mass of peptide (Da) <sup>a</sup> | Ion observed in scanning mode ( $m/z$ ) <sup>b</sup> | Fragmentation ions ( $m/z$ )                                                                                           |
|--------------------------------------------|-----------------------------------|------------------------------------------------|------------------------------------------------------|------------------------------------------------------------------------------------------------------------------------|
| Apaf1, (141.8)                             | SFR                               | 408.2                                          | [L + H] <sup>+</sup> (409.2)                         | y <sub>2</sub> (322.2), b <sub>2</sub> (235.1), y <sub>1</sub> (175.2), b <sub>1</sub> (88.0)                          |
|                                            | MHK                               | 414.2                                          | [L + H] <sup>+</sup> (415.2)                         | y <sub>2</sub> (284.3), b <sub>2</sub> (269.2), y <sub>1</sub> (147.3), b <sub>1</sub> (132.1)                         |
|                                            | DFR                               | 436.2                                          | [L + H] <sup>+</sup> (437.2)                         | y <sub>2</sub> (322.3), b <sub>2</sub> (263.1), a <sub>2</sub> (235.1), y <sub>1</sub> (175.1), b <sub>1</sub> (116.1) |
|                                            | LQAK                              | 458.3                                          | [L + H] <sup>+</sup> (459.3)                         | y <sub>3</sub> (346.3), b <sub>2</sub> (242.3), y <sub>2</sub> (218.3), y <sub>1</sub> (147.3)                         |
|                                            | AAMLIK                            | 645.4                                          | [L + H] <sup>+</sup> (646.4)                         | y <sub>5</sub> (575.4), y <sub>4</sub> (504.4), y <sub>3</sub> (373.3), b <sub>3</sub> (274.2), b <sub>2</sub> (143.1) |
|                                            | IFQSR                             | 649.4                                          | [L + H] <sup>+</sup> (650.4)                         | y <sub>3</sub> (390.3), b <sub>3</sub> (389.3), y <sub>2</sub> (262.3), b <sub>2</sub> (261.3)                         |
| APC, (311.6)                               | GSK                               | 290.2                                          | [L + H] <sup>+</sup> (291.2)                         | y <sub>2</sub> (234.3), y <sub>1</sub> (147.3), b <sub>2</sub> (145.1), b <sub>1</sub> (58.1)                          |
|                                            | GPR                               | 328.2                                          | [L + H] <sup>+</sup> (329.2)                         | y <sub>2</sub> (272.2), b <sub>1</sub> (58.1)                                                                          |
|                                            | QIR                               | 415.3                                          | [L + H] <sup>+</sup> (416.3)                         | y <sub>2</sub> (288.3), b <sub>2</sub> (242.2), a <sub>2</sub> (214.2), y <sub>1</sub> (175.2), b <sub>1</sub> (129.1) |
|                                            | APSR                              | 429.2                                          | [L + H] <sup>+</sup> (430.2)                         | y <sub>3</sub> (359.2), y <sub>2</sub> (262.2), y <sub>1</sub> (175.2), b <sub>2</sub> (169.2)                         |
|                                            | NADSK                             | 533.2                                          | [L + H] <sup>+</sup> (534.2)                         | y <sub>4</sub> (420.3), y <sub>3</sub> (349.2), b <sub>3</sub> (301.2), y <sub>2</sub> (234.3), b <sub>2</sub> (186.2) |
|                                            | SYGSR                             | 568.3                                          | [L + H] <sup>+</sup> (569.4)                         | y <sub>3</sub> (319.3), b <sub>3</sub> (308.2), y <sub>2</sub> (262.3), b <sub>2</sub> (251.1)                         |
|                                            | DNQAK                             | 574.3                                          | [L + H] <sup>+</sup> (575.3)                         | b <sub>3</sub> (358.2), y <sub>3</sub> (346.3), b <sub>2</sub> (230.1), y <sub>2</sub> (218.2)                         |
|                                            | VSTWR                             | 647.3                                          | [L + H] <sup>+</sup> (648.3)                         | y <sub>3</sub> (462.3), y <sub>2</sub> (361.3), b <sub>3</sub> (288.2), b <sub>2</sub> (187.2), y <sub>1</sub> (175.2) |
|                                            | LSQLPR                            | 712.4                                          | [L + H] <sup>+</sup> (713.4)                         | b <sub>4</sub> (442.4), y <sub>2</sub> (272.2)                                                                         |
|                                            | ALVAQLK                           | 741.5                                          | [L + H] <sup>+</sup> (742.5)                         | y <sub>5</sub> (558.4), y <sub>4</sub> (459.4), y <sub>3</sub> (388.3), b <sub>4</sub> (355.3)                         |
|                                            | NASSIPR                           | 743.4                                          | [L + H] <sup>+</sup> (744.4)                         | b <sub>5</sub> (473.3), y <sub>2</sub> (272.2), b <sub>3</sub> (273.2)                                                 |
|                                            | IQQIEK                            | 757.4                                          | [L + H] <sup>+</sup> (758.4)                         | y <sub>4</sub> (517.4), y <sub>3</sub> (389.4), b <sub>3</sub> (370.2), b <sub>2</sub> (242.1)                         |
| BCL2, (26.3)                               | NGISPPNK                          | 825.4                                          | [L + H] <sup>+</sup> (826.4)                         | b <sub>7</sub> (680.5), y <sub>4</sub> (455.4), b <sub>4</sub> (372.2)                                                 |
|                                            | DPVAR                             | 556.3                                          | [L + H] <sup>+</sup> (557.3)                         | b <sub>3</sub> (312.2), y <sub>2</sub> (246.3), a <sub>3</sub> (284.2)                                                 |
|                                            | EIVMK                             | 618.3                                          | [L + H] <sup>+</sup> (619.3)                         | y <sub>4</sub> (490.3), y <sub>3</sub> (377.3), b <sub>3</sub> (342.2), y <sub>2</sub> (278.3)                         |
|                                            | MAHAGR                            | 641.3                                          | [L + H] <sup>+</sup> (642.3)                         | y <sub>4</sub> (440.3), b <sub>3</sub> (340.2), y <sub>3</sub> (303.3), y <sub>1</sub> (175.2)                         |
|                                            | TGYDNR                            | 724.3                                          | [L + H] <sup>+</sup> (725.3)                         | b <sub>4</sub> (437.2), y <sub>4</sub> (567.4), y <sub>3</sub> (404.3), b <sub>3</sub> (322.2), y <sub>2</sub> (289.3) |
|                                            | DGVNWGR                           | 802.4                                          | [L + H] <sup>+</sup> (803.4)                         | y <sub>5</sub> (631.3), y <sub>4</sub> (532.3), y <sub>3</sub> (418.4), b <sub>4</sub> (386.2), y <sub>2</sub> (232.2) |
|                                            | QAGDDFSR                          | 894.4                                          | [L + H] <sup>+</sup> (895.4)                         | y <sub>6</sub> (696.3), y <sub>5</sub> (639.4), y <sub>4</sub> (524.3), b <sub>4</sub> (372.2), y <sub>3</sub> (409.3) |
|                                            | FATVVEELFR                        | 1209.6                                         | [L + H] <sup>+</sup> (1210.6)                        | y <sub>6</sub> (792.4), y <sub>5</sub> (693.5), b <sub>5</sub> (518.4),                                                |

|                   |           |        |                      |                                                                                             |
|-------------------|-----------|--------|----------------------|---------------------------------------------------------------------------------------------|
| BLM,<br>(159.0)   | KPK       | 371.3  | $[L + H]^+$ (372.3)  | $y_2$ (244.3), $b_1$ (129.1), $a_1$ (101.2)                                                 |
|                   | GPGR      | 385.2  | $[L + H]^+$ (386.3)  | $y_3$ (329.3), $b_3$ (212.2), $y_1$ (175.1),                                                |
|                   | ALVAK     | 500.3  | $[L + H]^+$ (501.3)  | $y_3$ (317.3), $b_3$ (284.2), $y_2$ (218.2), $b_2$ (185.2), $y_1$ (147.3)                   |
|                   | TASSGSK   | 636.3  | $[L + H]^+$ (637.3)  | $y_4$ (378.4), $b_3$ (347.2), $y_3$ (291.3), $y_2$ (234.3)                                  |
| BRCA1,<br>(67.3)  | IIR       | 400.3  | $[L + H]^+$ (401.3)  | $y_2$ (288.2), $b_2$ (227.2), $a_2$ (199.2), $y_1$ (175.1), $b_1$ (114.1)                   |
|                   | EPVSTK    | 659.3  | $[L + H]^+$ (660.3)  | $y_5$ (531.4), $b_4$ (413.2), $y_3$ (335.3), $b_3$ (326.2), $b_1$ (130.1)                   |
|                   | SVESNIEDK | 1019.5 | $[L + H]^+$ (1020.5) | $y_8$ (933.4), $y_6$ (705.3), $b_3$ (316.2), $b_1$ (88.0)                                   |
| BRCA2,<br>(384.2) | YI        | 294.2  | $[L + H]^+$ (295.2)  | $b_1$ (164.1), $a_1$ (136.1), $y_1$ (131.0)                                                 |
|                   | NGR       | 345.2  | $[L + H]^+$ (346.1)  | $y_2$ (232.1), $y_1$ (175.2), $b_2$ (172.1), $b_1$ (115.1)                                  |
|                   | ETAK      | 447.2  | $[L + H]^+$ (448.2)  | $b_3$ (302.2), $b_2$ (231.2), $y_1$ (147.3), $y_2$ (218.2)                                  |
|                   | INSK      | 460.3  | $[L + H]^+$ (461.3)  | $b_3$ (315.3), $a_3$ (287.3), $y_2$ (234.3), $b_2$ (228.1), $y_1$ (147.3)                   |
|                   | EEEEK     | 533.2  | $[L + H]^+$ (534.2)  | $b_3$ (388.2), $y_2$ (276.2), $b_2$ (259.2), $y_1$ (147.3)                                  |
|                   | SCGTK     | 551.2  | $[L + H]^+$ (552.2)  | $y_4$ (406.1), $b_3$ (305.2), $y_2$ (248.2), $y_1$ (147.1)                                  |
|                   | MFFK      | 571.3  | $[L + H]^+$ (572.3)  | $b_3$ (426.2), $y_2$ (294.4), $b_2$ (279.2), $y_1$ (147.3)                                  |
|                   | MPIGSK    | 631.3  | $[L + H]^+$ (632.6)  | $y_5$ (501.4), $b_3$ (342.2), $y_3$ (273.3), $b_1$ (132.2)                                  |
|                   | EFANR     | 635.3  | $[L + H]^+$ (636.3)  | $y_3$ (360.3), $b_3$ (348.2), $y_2$ (289.2), $b_2$ (277.2), $y_1$ (175.2)                   |
|                   | ENNENK    | 746.3  | $[L + H]^+$ (747.3)  | $y_4$ (504.4), $y_3$ (390.3), $b_3$ (358.2), $b_2$ (244.2), $y_2$ (261.2)                   |
|                   | YETPIK    | 749.4  | $[L + H]^+$ (750.4)  | $b_5$ (604.3), $b_3$ (394.2), $y_3$ (357.4), $y_1$ (147.1)                                  |
|                   | VFVPPFK   | 832.5  | $[L + H]^+$ (833.5)  | $b_6$ (687.5), $y_4$ (488.6), $b_3$ (346.2), $y_1$ (147.1)                                  |
|                   | TSSADTQK  | 836.4  | $[L + H]^+$ (837.4)  | $b_6$ (563.3), $y_4$ (491.4), $b_5$ (462.4), $y_3$ (376.3), $b_4$ (347.3)                   |
| CytC,<br>(11.7)   | EER       | 432.2  | $[L + Na]^+$ (455.2) | $y_2$ (304.2), $b_2$ (259.2), $y_1$ (175.2), $b_1$ (130.2)                                  |
|                   | IFIMK     | 650.4  | $[L + Na]^+$ (673.4) | $y_3$ (391.4), $b_4$ (505.3), $b_3$ (374.3), $y_2$ (278.3), $b_2$ (261.2),<br>$y_1$ (147.2) |
|                   | ADLIAYLK  | 905.5  | $[L + H]^+$ (906.5)  | $y_4$ (494.3), $b_4$ (413.2), $y_2$ (260.2), $b_2$ (187.1)                                  |
| HSP27,<br>(22.8)  | MTER      | 535.2  | $[L + H]^+$ (536.2)  | $y_3$ (405.3), $y_2$ (304.2), $b_2$ (233.1), $y_1$ (175.2), $b_1$ (132.1)                   |
|                   | HTADR     | 598.3  | $[L + H]^+$ (599.4)  | $y_3$ (361.3), $b_3$ (310.2), $y_2$ (290.2), $b_2$ (239.1), $y_1$ (175.2)                   |
|                   | DWYPHSR   | 959.4  | $[L + H]^+$ (960.5)  | $b_5$ (699.3), $y_4$ (496.6), $b_3$ (465.2), $y_2$ (262.2)                                  |
| HSP70,<br>(54.8)  | NSAK      | 418.2  | $[L + H]^+$ (419.2)  | $y_3$ (305.3), $y_2$ (218.2), $b_2$ (202.1), $y_1$ (147.3), $b_1$ (115.1)                   |
|                   | DILVK     | 586.4  | $[L + H]^+$ (587.4)  | $y_3$ (359.4), $b_3$ (342.2), $y_2$ (246.3), $b_2$ (229.1), $y_1$ (147.3)                   |
|                   | SNILVFK   | 819.5  | $[L + H]^+$ (820.5)  | $b_5$ (527.4), $y_4$ (506.6), $b_4$ (428.3), $y_3$ (393.5), $b_3$ (315.2),<br>$y_1$ (147.3) |
| p16,<br>(16.5)    | AGAR      | 373.2  | $[L + Na]^+$ (396.1) | $y_2$ (246.1), $b_3$ (200.2), $y_1$ (175.2), $b_2$ (129.1), $a_2$ (101.1)                   |
|                   | YLR       | 450.3  | $[L + H]^+$ (451.3)  | $y_2$ (288.3), $b_2$ (277.1), $y_1$ (175.2), $b_1$ (164.1)                                  |
|                   | GSNHAR    | 640.3  | $[L + H]^+$ (641.3)  | $b_4$ (396.2), $y_3$ (383.4), $b_3$ (259.1), $y_2$ (246.3),                                 |
| p21,<br>(18.1)    | KP        | 243.2  | $[L + H]^+$ (244.2)  | $b_1$ (129.1), $y_1$ (116.1)                                                                |
|                   | LIFSK     | 606.4  | $[L + H]^+$ (607.4)  | $b_4$ (461.3), $y_3$ (381.5), $b_3$ (374.2), $y_2$ (234.3), $b_2$<br>(227.2), $y_1$ (147.3) |
|                   | QNPCGSK   | 789.3  | $[L + H]^+$ (790.3)  | $y_5$ (548.4), $b_4$ (500.2), $y_3$ (291.3), $b_2$ (243.3)                                  |
|                   | LYLPTGPR  | 915.5  | $[L + H]^+$ (916.5)  | $b_6$ (645.4), $y_5$ (527.7), $b_3$ (390.2), $y_2$ (272.3),                                 |
|                   | MSEPAGDVR | 960.4  | $[L + H]^+$ (961.4)  | $y_6$ (614.4), $b_5$ (516.3), $y_4$ (446.3), $b_3$ (348.2)                                  |
| p53,<br>(43.7)    | NTFR      | 536.3  | $[L + H]^+$ (537.4)  | $b_3$ (363.3), $y_2$ (322.3), $b_2$ (216.1), $y_1$ (175.2), $b_1$ (115.1)                   |
|                   | VCACPGR   | 818.4  | $[L + H]^+$ (819.4)  | $b_6$ (645.2), $b_4$ (491.1), $y_3$ (329.6), $y_1$ (175.2)                                  |
|                   | NSFEVR    | 750.4  | $[L + H]^+$ (751.4)  | $b_4$ (478.4), $y_3$ (403.4), $b_3$ (349.2), $y_2$ (274.4)                                  |
|                   | CPHHER    | 834.4  | $[L + H]^+$ (835.3)  | $y_5$ (675.4), $y_3$ (441.5), $b_3$ (395.2), $y_2$ (304.3), $b_1$ (161.2)                   |
|                   | VEYLDDR   | 908.4  | $[L + H]^+$ (909.4)  | $y_4$ (518.7), $b_4$ (505.4), $y_3$ (405.6), $b_3$ (392.2)                                  |
| RB<br>(106.2)     | SPK       | 330.2  | $[L + H]^+$ (331.3)  | $y_2$ (244.2), $b_1$ (88.1)                                                                 |
|                   | SPYK      | 493.3  | $[L + H]^+$ (494.3)  | $y_3$ (407.3), $b_3$ (348.2), $y_1$ (147.3), $b_1$ (88.1)                                   |
|                   | MTPR      | 503.3  | $[L + H]^+$ (504.3)  | $y_2$ (272.3), $b_2$ (233.2)                                                                |
|                   | LYYR      | 613.3  | $[L + H]^+$ (614.6)  | $b_3$ (440.2), $y_2$ (338.4), $b_2$ (277.1), $y_1$ (175.2)                                  |
|                   | LAYLR     | 634.4  | $[L + H]^+$ (635.3)  | $y_3$ (451.5), $b_3$ (348.2), $y_2$ (288.4), $b_2$ (185.1), $y_1$ (175.2)                   |

|                 |          |       |                              |                                                                                                                        |
|-----------------|----------|-------|------------------------------|------------------------------------------------------------------------------------------------------------------------|
| SMS,<br>(41.3)  | AKP      | 314.2 | [L + H] <sup>+</sup> (315.3) | y <sub>2</sub> (244.2), b <sub>2</sub> (200.1), a <sub>2</sub> (172.1), y <sub>1</sub> (116.1)                         |
|                 | EGR      | 360.2 | [L + H] <sup>+</sup> (361.3) | y <sub>2</sub> (232.1), b <sub>2</sub> (187.1), y <sub>1</sub> (175.2), a <sub>2</sub> (159.2), b <sub>1</sub> (130.1) |
|                 | QDGK     | 446.2 | [L + H] <sup>+</sup> (447.2) | b <sub>3</sub> (301.2), b <sub>2</sub> (244.1), y <sub>2</sub> (204.1), y <sub>1</sub> (147.3)                         |
|                 | GGAIDR   | 587.3 | [L + H] <sup>+</sup> (587.4) | y <sub>4</sub> (474.3), y <sub>3</sub> (403.2), b <sub>3</sub> (186.2), y <sub>1</sub> (175.2), b <sub>2</sub> (115.1) |
|                 | AIMGSGK  | 662.3 | [L + H] <sup>+</sup> (663.2) | b <sub>5</sub> (460.3), b <sub>4</sub> (373.3), y <sub>4</sub> (348.4), b <sub>3</sub> (316.2), y <sub>3</sub> (291.3) |
|                 | YWPTADGR | 964.4 | [L + H] <sup>+</sup> (965.5) | y <sub>6</sub> (616.4), b <sub>4</sub> (548.3), y <sub>4</sub> (418.5), b <sub>2</sub> (350.2), y <sub>2</sub> (232.2) |
| XP-C<br>(106.0) | VAR      | 344.2 | [L + H] <sup>+</sup> (345.3) | y <sub>2</sub> (546.2), y <sub>1</sub> (175.2), b <sub>2</sub> (171.1), b <sub>1</sub> (100.1)                         |
|                 | FNK      | 407.2 | [L + H] <sup>+</sup> (408.3) | b <sub>2</sub> (262.1), y <sub>2</sub> (261.3), a <sub>2</sub> (234.2), b <sub>1</sub> (148.1), y <sub>1</sub> (147.3) |
|                 | THR      | 412.2 | [L + H] <sup>+</sup> (413.2) | y <sub>2</sub> (312.2), b <sub>2</sub> (239.2), y <sub>1</sub> (175.2), b <sub>1</sub> (102.2)                         |
|                 | AHHLK    | 604.3 | [L + H] <sup>+</sup> (605.4) | y <sub>3</sub> (397.4), b <sub>3</sub> (346.2), y <sub>2</sub> (260.3), b <sub>2</sub> (209.1), y <sub>1</sub> (147.3) |
|                 | AAGGEPR  | 656.3 | [L + H] <sup>+</sup> (657.4) | y <sub>5</sub> (515.4), b <sub>5</sub> (386.2), y <sub>2</sub> (272.2), b <sub>2</sub> (143.2)                         |
|                 | DFPSDLK  | 820.4 | [L + H] <sup>+</sup> (821.5) | y <sub>5</sub> (559.3), b <sub>4</sub> (447.3), y <sub>3</sub> (375.5), b <sub>2</sub> (263.2)                         |

<sup>a</sup> Generated by ExPASy base. <sup>b</sup> L denotes the respective characteristic peptide

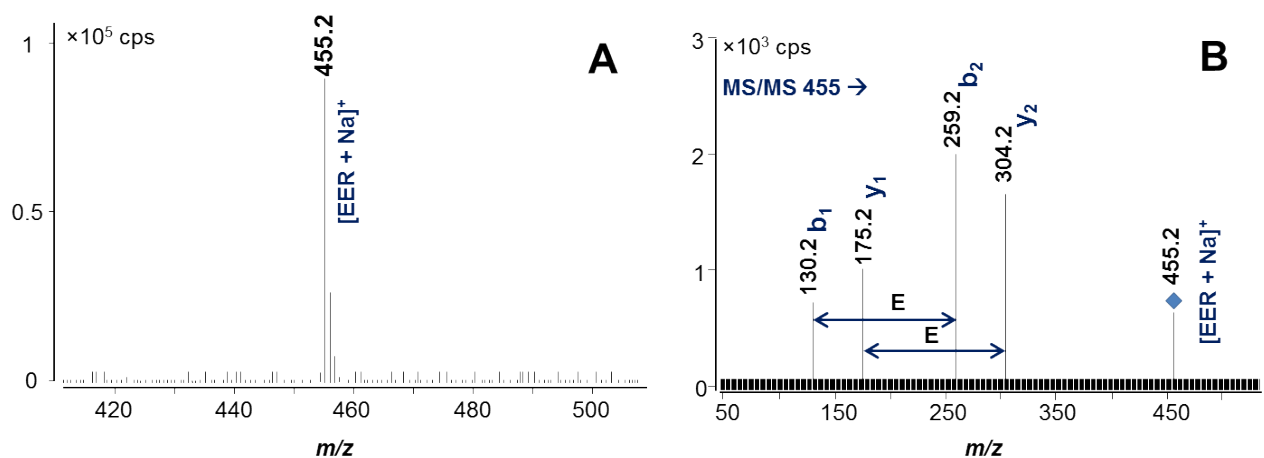

**Fig. S4** Representative spectra used for identification of a specific cytochrome c peptide EER (positive ionization mode): A - scanning spectrum registered for the  $\mu$ HPLC signal at 12 min B - spectrum for the fragmentation ion of  $m/z$  455 (collision energy 30 eV).
